# Supplementary material for: The WAIS Divide deep ice core WD2014 chronology – Part 1: Methane synchronization (68–31 ka BP) and the gas age–ice age difference
Source: Copernicus journal article supplement (doi:10.5194/cp-11-153-2015), 2015-02-05
Supplement: Supplementary file 1 [file cp-11-153-2015-supplement.zip]

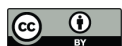

## *Supplement of*

# **The WAIS Divide deep ice core WD2014 chronology – Part 1: Methane synchronization (68–31 ka BP) and the gas age–ice age difference**

**C. Buizert et al.**

*Correspondence to:* C. Buizert ([buizertc@science.oregonstate.edu](mailto:buizertc@science.oregonstate.edu))

- [cp-11-153-2015-supplement-cover-letter.pdf](#)
- [Buizert\\_WD2014\\_Dage\\_fileheader.txt](#)
- [Buizert\\_WD2014\\_data.txt](#)
